# Supplementary material for: Quantitative trait loci mapping of heterosis for leaf morphological traits and candidate gene identification in maize
Source: Research Square preprint supplement (doi:10.21203/rs.3.rs-7933843/v1), 2025-11-20
Supplement: Supplementary file 1 [file d717f792cbd42491ba7363f8.docx]

**Supplementary data**

**Table S1** Summary of QTLs detected more than twice in different locations or traits, or populations.

| **Pop.** | **Chr.** | **Pos.** | **Trait** | **LM** | **RM** | **LOD** | **PVE %** | **Add.** | **Dom.** |
| --- | --- | --- | --- | --- | --- | --- | --- | --- | --- |
| 1 | 1 | Y/S | LA | 73665934 | 100107108 | 2.82/2.99 | 6.06/1.25 | 1.13/5.85 | −0.31/−4.51 |
| 1 | 1 | Y/S | LA | 174447421 | 179513953 | 2.55/3.87 | 1.20/1.52 | 6.27/5.01 | 1.11/7.11 |
| 1 | 1 | Y | LA/LL | 279099078 | 298248083 | 3.51/3.04 | 7.22/8.98 | −0.97/5.79 | 10.11/−1.61 |
| 1 | 2 | Y/S | LA/LL | 28658195 | 81769401 | 2.56/4.41 | 0.33/2.17 | −2.37/1.11 | −0.71/−4.61 |
| 1 | 4 | Y/S | LW | 115785194 | 119532283 | 3.36/2.90 | 0.16/3.14 | 1.81/−0.12 | −2.29/0.73 |
| 1 | 4 | S | LA/LL | 159494277 | 202184781 | 3.18/2.85 | 2.15/11/78 | 4.16/−2.72 | −2.84/−4.43 |
| 2 | 7 | Y | LA/LW | 113530151 | 115891838 | 2.72/5.63 | 6.67/1.49 | −0.58/19.34 | −1.11/−17.67 |
| 2 | 8 | Y/S | LL/LW | 160921822 | 163474805 | 2.51/3.05 | 7.03/16.01 | −0.41/2.21 | −0.87/−10.76 |
| 2 | 9 | Y/S | LW | 132740535 | 139382661 | 3.88/36.92 | 1.68/0.00 | 2.83/11.61 | −2.67/−11.93 |
| 2 | 10 | Y | LL/LW | 48040836 | 49642445 | 3.21/5.01 | 9.87/19.97 | 5.62/6.85 | 4.11/3.09 |
| 3 | 10 | S | LL/LW | 46877056 | 49642624 | 3.11/3.58 | 9.97/12.67 | −2.62/−1.08 | −7.62/1.75 |
| 3 | 10 | Y/S | LL/LW | 49642629 | 64921149 | 3.19/2.81 | 1.83/8.72 | 7.04/−0.65 | 7.62/−0.56 |
| 3/4 | 1 | Y | LL | 174548762 | 178064404 | 2.94/4.66 | 8.17/1.91 | 5.36/−9.32 | 8.52/7.16 |
| 3/4 | 1 | Y/S | LA/LL | 174548762 | 178064404 | 2.72/5.52 | 3.05/1.63 | 0.66/−0.43 | 5.81/−13.58 |
| 3/4 | 3 | Y/S | LL | 199377395 | 213090270 | 2.73/3.32 | 2.00/0.88 | −0.21/6.89 | −13.75/6.32 |
| 4 | 3 | Y/S | LA/LL | 25424365 | 44292006 | 6.70/3.70 | 10.5/1.06 | 0.51/−5.01 | 4.55/4.23 |
| 4 | 7 | Y | LL/LW | 64858808 | 73342585 | 4.20/6.29 | 7.88/6.17 | −3.30/−0.53 | −3.49/0.22 |
| 4 | 9 | Y/S | LL | 66491743 | 78374563 | 4.19/7.23 | 1.65/0.87 | −10.12/−5.74 | 10.01/7.57 |
| 4 | 10 | S | LA/LL | 98157525 | 117368329 | 2.77/4.61 | 4.31/1.15 | 2.96/5.33 | 2.82/6.65 |
| 4 | 10 | Y/S | LL | 98157525 | 117368329 | 4.45/4.41 | 1.49/0.85 | −7.3/−6.32 | 9.46/5.54 |
| 5 | 1 | Y/S | LA/LW | 96894352 | 100107135 | 3.90/2.73 | 0.56/0.56 | −4.36/−0.46 | −3.22/0.07 |
| 5 | 1 | Y | LA/LW | 108749716 | 115473464 | 5.50/3.46 | 1.40/1.48 | 6.05/−0.98 | −6.07/0.80 |
| 5 | 1 | Y | LA/LL/LW | 247362432 | 247516624 | 3.63/4.43 | 0.90/1.72 | −6.41/6.73 | −5.16/6.62 |
| 5 | 2 | Y | LL/LW | 82750582 | 92836941 | 2.84/2.90 | 2.99/0.91 | 5.93/0.84 | 13.01/1.08 |
| 5 | 2 | Y | LA/LL/LW | 175981496 | 178005425 | 4.91/2.70/2.80 | 1.51/7.06/1.43 | 4.59/−4.45/−0.91 | −2.2/1.23/1.49 |
| 5 | 2 | Y/S | LA/LL | 183721137 | 190828747 | 3.97/3.92 | 0.92/1.08 | −2.4/−8.45 | 8.14/9.27 |
| 5 | 3 | S | LA/LW | 3374692 | 7113064 | 4.55/3.42 | 2.07/5.00 | 0.95/−0.10 | −2.8/−0.68 |
| 5 | 3 | S | LL/LW | 160402045 | 176756281 | 25.4/15.29 | 1.37/1.87 | −0.63/−0.04 | 85.6/9.18 |
| 5 | 4 | Y/S | LA/LL | 39214148 | 40153042 | 2.63/8.60 | 0.60/1.73 | 12.87/−15.97 | −13.89/14.92 |
| 5 | 4 | Y/S | LA | 152747646 | 165556428 | 2.69/2.92 | 1.13/6.27 | −4.71/0.31 | −4.38/3.04 |
| 5 | 4 | S | LL/LW | 177564386 | 182883765 | 9.17/19.78 | 0.74/2.60 | −0.80/−0.02 | 61.2/10.79 |
| 5 | 4 | Y/S | LA | 239166270 | 246993580 | 4.01/2.57 | 1.30/2.26 | 5.37/1.89 | −5.80/0.54 |
| 5 | 5 | Y/S | LL | 185696682 | 186484045 | 3.09/2.95 | 7.27/9.35 | 4.31/−2.18 | −3.84/2.11 |
| 5 | 7 | S | LA/LL | 14494564 | 35855994 | 9.19/85.00 | 2.48/9.65 | −0.73/0.74 | 10.17/80.62 |
| 5 | 7 | Y | LL/LW | 97735394 | 107021656 | 2.59/2.90 | 5.38/5.32 | 5.73/0.66 | 1.01/0.57 |
| 5 | 7 | Y/S | LA/LL | 168330878 | 175260924 | 3.84/2.56 | 0.64/1.67 | −4.76/−0.39 | −5.21/−17.47 |
| 5 | 7 | S | LA/LL/LW | 180275988 | 182147738 | 23.3/75.04/60.17 | 9.18/8.96/8.60 | 0.75/−1.42/−0.11 | −21.82/−77.42/−9.78 |
| 5 | 8 | Y/S | LA/LL | 57866895 | 71822295 | 5.44/4.34 | 1.47/1.63 | −7.10/5.11 | −3.82/7.30 |
| 5 | 10 | Y/S | LA | 81142670 | 84270720 | 2.58/2.72 | 3.26/2.31 | −4.10/−1.45 | −2.22/−4.28 |
| 5/6 | 2 | Y/S | LL/LW | 168276128 | 170924725 | 2.71/3.25 | 3.02/5.88 | −0.54/2.84 | −0.19/−1.18 |
| 5/6 | 2 | S | LL/LW | 223087161 | 231668423 | 3.55/2.53 | 0.69/2.21 | −1.11/0.71 | −5.11/0.86 |
| 5/6 | 3 | Y | LA/LL | 11832638 | 24121121 | 3.99/2.60 | 0.61/5.95 | 4.42/−5.94 | −3.33/4.27 |
| 6 | 1 | S | LL/LW | 278485808 | 279099123 | 4.14/3.83 | 13.91/3.14 | −0.83/0.11 | −9.05/−2.04 |
| 6 | 2 | Y | LL/LW | 53046914 | 56497447 | 2.57/4.33 | 3.76/14.28 | 3.59/0.30 | −30.50/−3.89 |
| 6 | 2 | S | LA/LL/LW | 225522717 | 231668546 | 2.55/3.22/2.78 | 4.94/10.22/7.09 | −0.66/4.70/0.84 | 6.94/0.12/0.22 |
| 6 | 3 | Y | LL/LW | 162373795 | 174431474 | 3.27/2.74 | 4.67/7.80 | 8.29/0.85 | 9.88/1.00 |
| 6 | 5 | Y/S | LL | 185735549 | 189511199 | 5.07/3.87 | 7.43/5.53 | 4.40/4.47 | −15.93/1.02 |
| 6 | 7 | Y | LL/LW | 64559332 | 67837526 | 7.51/3.10 | 19.3/11.56 | −1.75/0.50 | −16.35/−1.92 |
| 6 | 7 | S | LA/LL | 102989825 | 107021656 | 2.76/3.41 | 8.20/15.03 | −2.12/2.02 | −9.89/4.99 |
| 6 | 8 | Y/S | LA/LW | 12065062 | 14534706 | 3.35/2.53 | 7.66/4.33 | 0.43/−0.06 | −0.68/6.54 |
| 6 | 8 | Y/S | LW | 90438124 | 100289694 | 4.24/2.64 | 6.52/2.42 | −0.89/0.68 | 0.21/0.80 |
| 6 | 8 | Y | LL/LW | 115394963 | 117524037 | 10.23/11.27 | 23.31/32.32 | −0.10/−0.49 | −35.37/−7.42 |
| 6 | 9 | S | LL/LW | 111675390 | 120015606 | 2.76/2.59 | 6.36/4.50 | −3.01/−0.60 | 3.25/0.06 |
| 1 | 4 | S | LL | 159494277 | 199733784 | 3.68 | 4.87 | −1.07 | −9.51 |
| 1 | 4 | S | LL | 202184781 | 232236350 | 2.52 | 7.32 | −4.89 | −2.13 |
| 4 | 4 | S | LL | 238071362 | 246993212 | 3.91 | 1.42 | −7.58 | 5.07 |
| 1 | 3 | S | LL | 158851151 | 183495793 | 2.52 | 8.40 | −2.32 | 9.93 |
| 2 | 5 | Y | LL | 209361126 | 210567287 | 3.24 | 5.29 | 3.99 | −9.40 |
| 3 | 3 | Y | LL | 91340452 | 94481414 | 3.04 | 3.81 | 6.98 | 10.78 |
| 3 | 5 | S | LL | 123911150 | 136589699 | 2.94 | 7.73 | 0.80 | −6.49 |
| 3 | 8 | S | LL | 14647082 | 24006459 | 5.11 | 15.46 | −2.40 | 0.49 |
| 3 | 9 | Y | LL | 66491743 | 90454068 | 4.70 | 9.91 | −2.61 | −8.53 |
| 4 | 1 | S | LL | 271657758 | 284910018 | 7.53 | 0.90 | −6.70 | 7.70 |
| 4 | 1 | Y | LL | 302787229 | 302787283 | 4.84 | 1.56 | −6.73 | 7.61 |
| 4 | 2 | S | LL | 75525792 | 81769560 | 7.88 | 0.91 | −6.53 | 5.54 |
| 4 | 4 | S | LL | 98390480 | 107813099 | 6.81 | 0.89 | −6.79 | 7.28 |
| 4 | 5 | S | LL | 170092967 | 175555786 | 8.30 | 0.91 | 6.84 | 5.29 |
| 4 | 6 | Y | LL | 102284789 | 102284805 | 3.55 | 1.32 | 0.68 | −16.04 |
| 4 | 6 | S | LL | 157979697 | 164021310 | 3.14 | 1.01 | 0.12 | −12.59 |
| 4 | 9 | S | LL | 49501159 | 61643570 | 5.25 | 0.81 | −7.13 | 5.06 |
| 4 | 10 | S | LL | 84270783 | 96152056 | 3.55 | 0.71 | 4.55 | 5.43 |
| 5 | 2 | Y | LL | 77303261 | 79776554 | 2.82 | 2.51 | 4.80 | 7.79 |
| 5 | 5 | Y | LL | 175555790 | 180732368 | 3.13 | 5.25 | −0.29 | −5.31 |
| 5 | 6 | S | LL | 64459583 | 71987937 | 24.31 | 1.30 | −0.04 | −82.69 |
| 1 | 1 | S | LA | 190831576 | 215241256 | 5.17 | 8.43 | −2.78 | 2.22 |
| 1 | 2 | Y | LA | 102789268 | 158368895 | 3.43 | 1.31 | 0.61 | 9.67 |
| 1 | 3 | Y | LA | 42531945 | 85490541 | 2.78 | 1.55 | 6.00 | −6.00 |
| 1 | 3 | Y | LA | 42531945 | 85490541 | 5.49 | 1.28 | −7.24 | −5.65 |
| 1 | 4 | Y | LA | 19222643 | 40628145 | 2.88 | 1.21 | −0.05 | 11.48 |
| 1 | 4 | Y | LA | 40628145 | 53452319 | 2.79 | 1.13 | −5.15 | −6.40 |
| 1 | 4 | Y | LA | 122773454 | 123644066 | 13.19 | 10.06 | 0.67 | 12.60 |
| 1 | 6 | Y | LA | 4436843 | 15682746 | 4.55 | 1.29 | 0.65 | 14.67 |
| 1 | 6 | Y | LA | 128560301 | 141418692 | 2.91 | 1.16 | 7.77 | −5.18 |
| 1 | 9 | S | LA | 32539721 | 36659410 | 3.92 | 6.05 | 1.74 | −0.82 |
| 1 | 9 | Y | LA | 111664117 | 151185920 | 3.10 | 1.33 | −0.23 | 10.23 |
| 1 | 9 | Y | LA | 111664117 | 151185920 | 2.86 | 1.73 | 11.24 | −10.59 |
| 2 | 2 | Y | LA | 118268124 | 176174387 | 6.25 | 1.46 | 19.25 | −18.27 |
| 4 | 5 | Y | LA | 170092967 | 180732390 | 2.74 | 5.95 | −0.96 | 8.24 |
| 4 | 5 | Y | LA | 180732390 | 190352919 | 5.33 | 7.50 | 3.57 | −2.27 |
| 5 | 1 | Y | LA | 159063877 | 165096164 | 3.60 | 5.09 | 3.27 | −5.32 |
| 5 | 1 | Y | LA | 167922529 | 171154020 | 2.71 | 1.13 | 4.78 | −4.08 |
| 5 | 1 | Y | LA | 191578667 | 194385349 | 3.04 | 3.37 | −2.50 | 13.99 |
| 5 | 4 | Y | LA | 71954221 | 77395866 | 6.96 | 1.49 | −5.86 | −4.63 |
| 5 | 4 | Y | LA | 138554791 | 145614672 | 2.57 | 0.76 | 0.35 | 6.65 |
| 5 | 7 | Y | LA | 90001220 | 97735188 | 4.49 | 1.26 | 4.17 | −3.24 |
| 5 | 7 | Y | LA | 129978487 | 135914233 | 3.79 | 1.42 | −3.85 | −5.22 |
| 5 | 7 | Y | LA | 151537775 | 155687486 | 5.80 | 0.60 | 0.33 | 12.76 |
| 5 | 7 | Y | LA | 168330878 | 175260924 | 2.85 | 1.62 | −3.78 | −4.04 |
| 5 | 7 | Y | LA | 167560191 | 175260924 | 2.58 | 1.82 | 4.00 | 10.66 |
| 5 | 8 | Y | LA | 10844557 | 16104543 | 4.46 | 1.48 | 4.49 | −4.02 |
| 5 | 8 | Y | LA | 57866895 | 71822295 | 4.27 | 1.63 | −4.60 | −0.87 |
| 5 | 10 | Y | LA | 35919656 | 37737743 | 3.26 | 1.66 | −3.80 | −4.80 |
| 6 | 2 | S | LA | 112358626 | 116157900 | 4.17 | 6.34 | −2.37 | −4.57 |
| 6 | 9 | Y | LA | 96310237 | 98477790 | 2.81 | 5.62 | 4.58 | −3.04 |
| 2 | 3 | Y | LW | 43578660 | 81953865 | 5.74 | 1.67 | 2.79 | −2.93 |
| 2 | 5 | Y | LW | 192528867 | 209361126 | 3.16 | 1.72 | 2.84 | −2.48 |
| 4 | 4 | Y | LW | 152747646 | 165556428 | 4.55 | 1.56 | −6.90 | −6.65 |
| 5 | 6 | S | LW | 145810994 | 151191944 | 2.72 | 0.64 | −0.35 | −0.72 |
| 6 | 2 | S | LW | 165733686 | 168276179 | 2.72 | 2.42 | 0.64 | 0.70 |
| 6 | 9 | Y | LW | 76313199 | 78369514 | 4.87 | 10.00 | 0.64 | −0.26 |
| 6 | 10 | S | LW | 17273693 | 18560049 | 5.42 | 1.66 | −0.18 | −1.59 |

Abbreviations: QTLs, quantitative trait locus; LL, leaf length; LW, leaf width; LA, leaf angle; Pop., population; Chr., chromosome; Pos., position; LM, left marker; RM, right marker; LOD, logarithm of odds; PVE, phenotypic variance explained; Add., additive effect; Dom., dominant effect; Y, Yanshan location; S, Songming location.
